# Supplementary material for: Mitigation of resistance increase in positive electrodes of lithium-ion batteries during floating–cycling by operating voltage control
Source: Royal Society of Chemistry journal article supplement (doi:10.1039/d5eb00096c), 2025-01-01
Supplement: d5eb00096c1.pdf [file d5eb00096c1.pdf]

## Supplementary Information

### **Mitigation of resistance increase in positive electrodes of lithium-ion batteries during floating-cycling modes by operating voltage control**

Tetsuya Omiya<sup>a</sup>, Atsunori Ikezawa<sup>a</sup>, Keita Takahashi<sup>b</sup>, Keiichi Saito<sup>b</sup>, Masao Yonemura<sup>c</sup>, Takashi Saito<sup>c</sup>, Takashi Kamiyama<sup>c,d,e</sup>, Kazuhiro Mori<sup>c</sup> and Hajime Arai<sup>\*a,c</sup>

<sup>a</sup> Institute of Science Tokyo, 4259, Nagatsuta, Yokohama, Midori-ku, Kanagawa, 226-8501, Japan

<sup>b</sup> NTT Anode Energy Corporation., Granparktower, 3-4-1 Shibaura, Minato-ku, Tokyo, 105-0023, Japan

<sup>c</sup> High Energy Accelerator Research Organization 203-1, Oazashirane, Tokai, Naka, Ibaraki, 319-1195, Japan

<sup>d</sup> Institute of High Energy Physics, Chinese Academy of Sciences, Beijing, 100049, China

<sup>e</sup> Spallation Neutron Source Science Center, Dongguan, 523803, China

Table S1. Overview of durability test conditions and parameters.

| Mode             | Step              | Parameters                                          | Termination          |
|------------------|-------------------|-----------------------------------------------------|----------------------|
| Floating-cycling | 1) CCCV Charge    | $I = 1.675\text{ A (0.5 C)}$ , $V = \text{Variant}$ | $t > 18\text{ h}$    |
|                  | 2) CC Discharge   | $I = -3.35\text{ A (1 C)}$                          | $V = \text{Variant}$ |
|                  | 3) Discharge Rest | $V = \text{open circuit voltage}$                   | $t > 5\text{ h}$     |

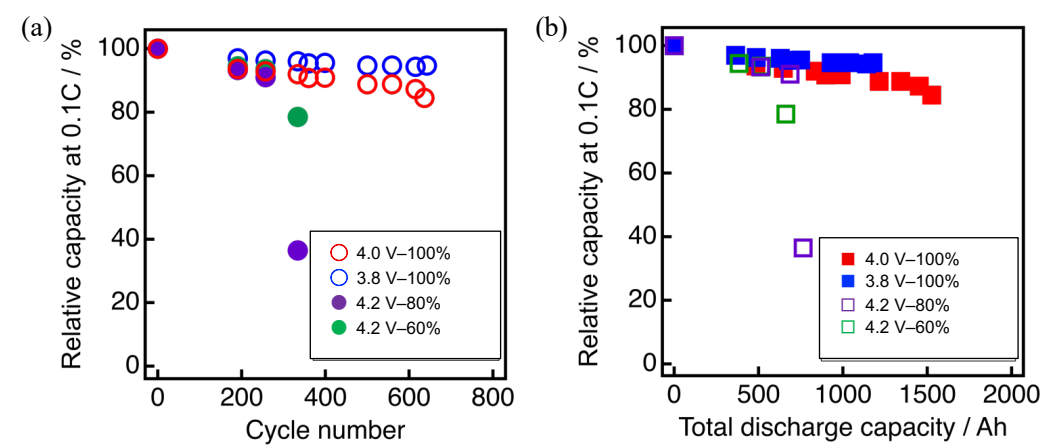

Fig. S1 Relative capacity of the horizontally-set cells at 0.1 C discharging after the durability test versus (a) tested days and (b) total discharge capacity (run at 1 C).

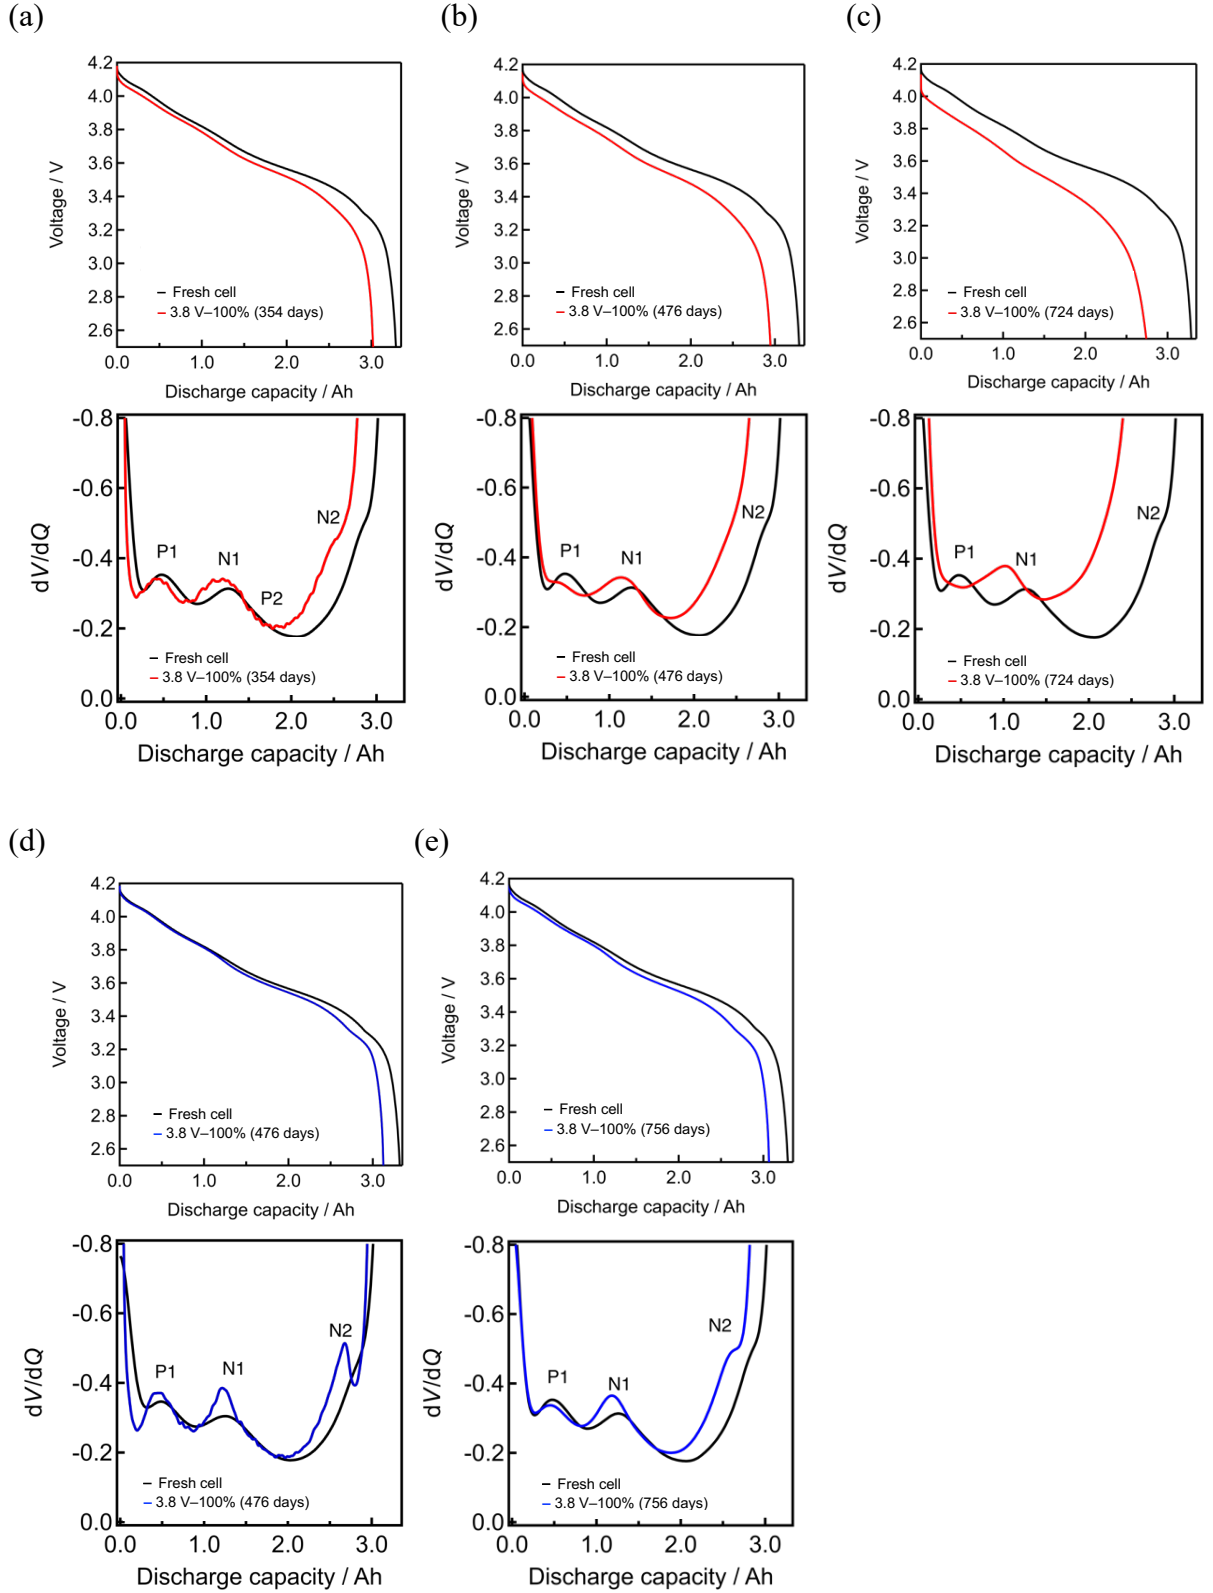

Fig. S2 0.1 C discharge profiles and the corresponding  $dV/dQ$  profiles of 4.0 V-100% cell after (a) 354, (b) 476 and (c) 724 days and 3.8 V-100% cell after (d) 476 and (e) 756 days.

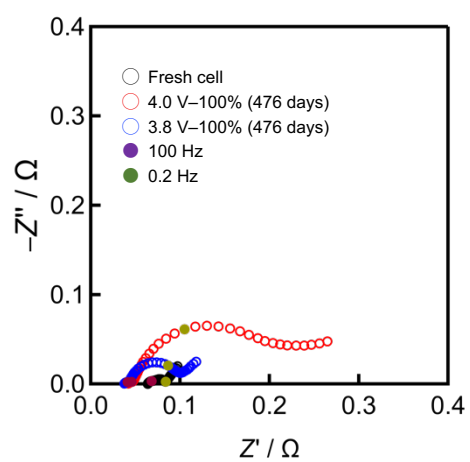

Fig. S3 Nyquist plots of 4.0 V-100% (after 476 days) and 3.8 V-100% (after 476 days) cells at fully charged states.

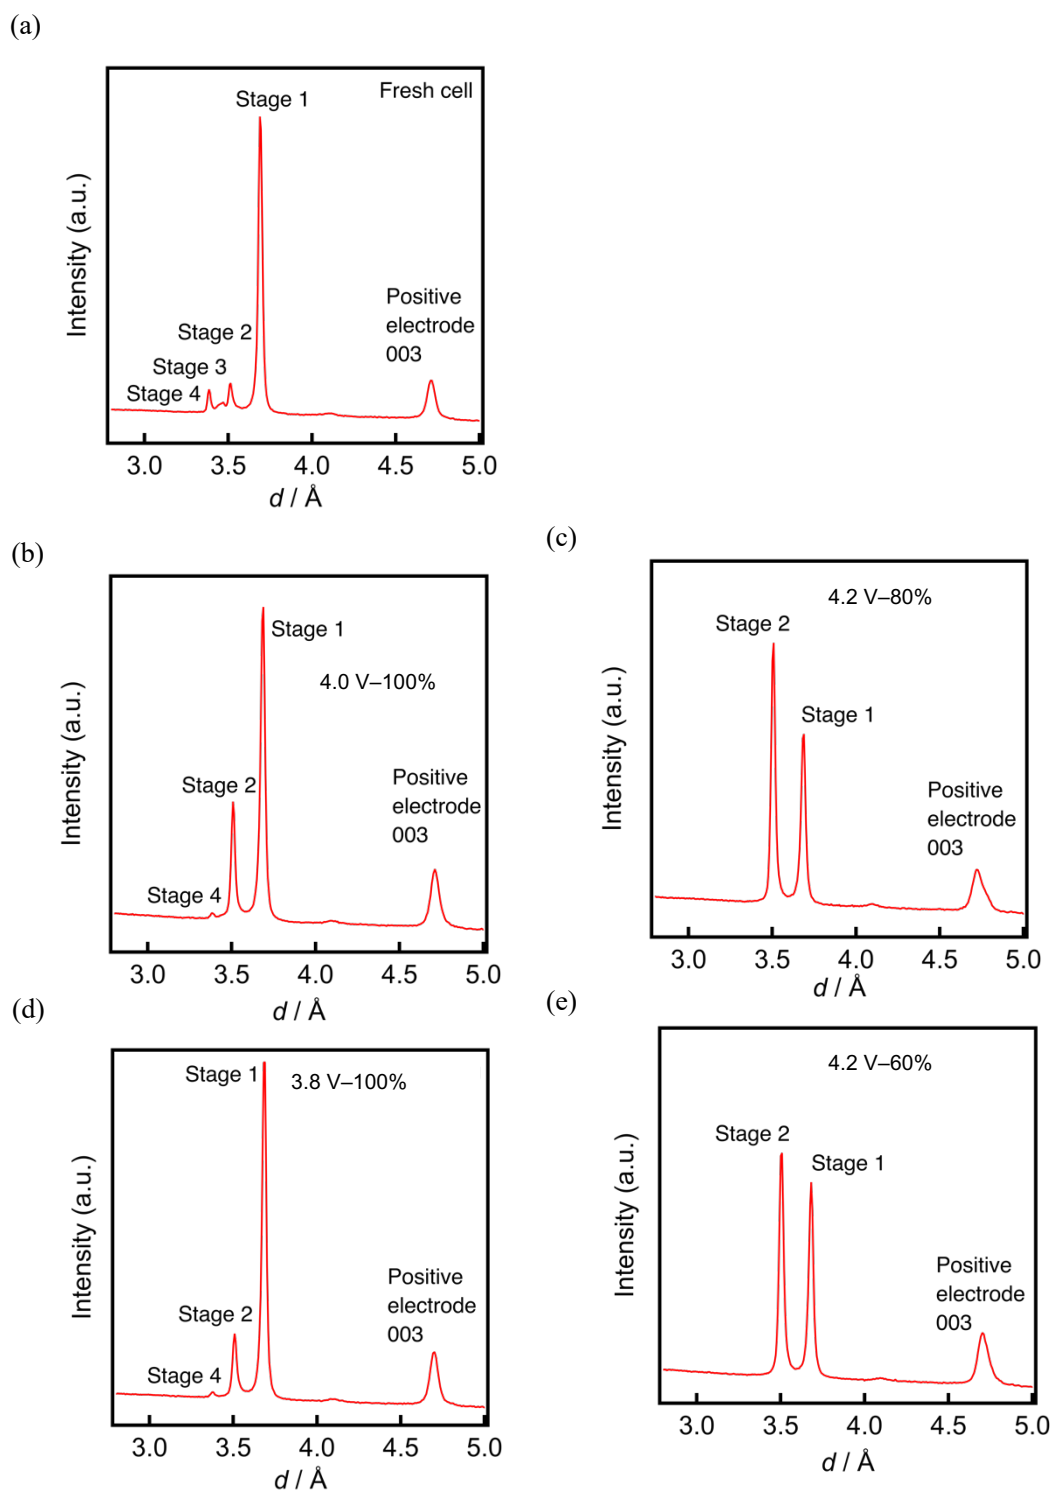

Fig. S4 In-situ neutron diffraction profiles at the end of charging of (a) fresh cell, (b) 4.0 V–100% after 476 days, (c) 4.2 V–80% after 323 days, (d) 3.8 V–100% after 476 days, and (e) 4.2 V–60% after 428 days.

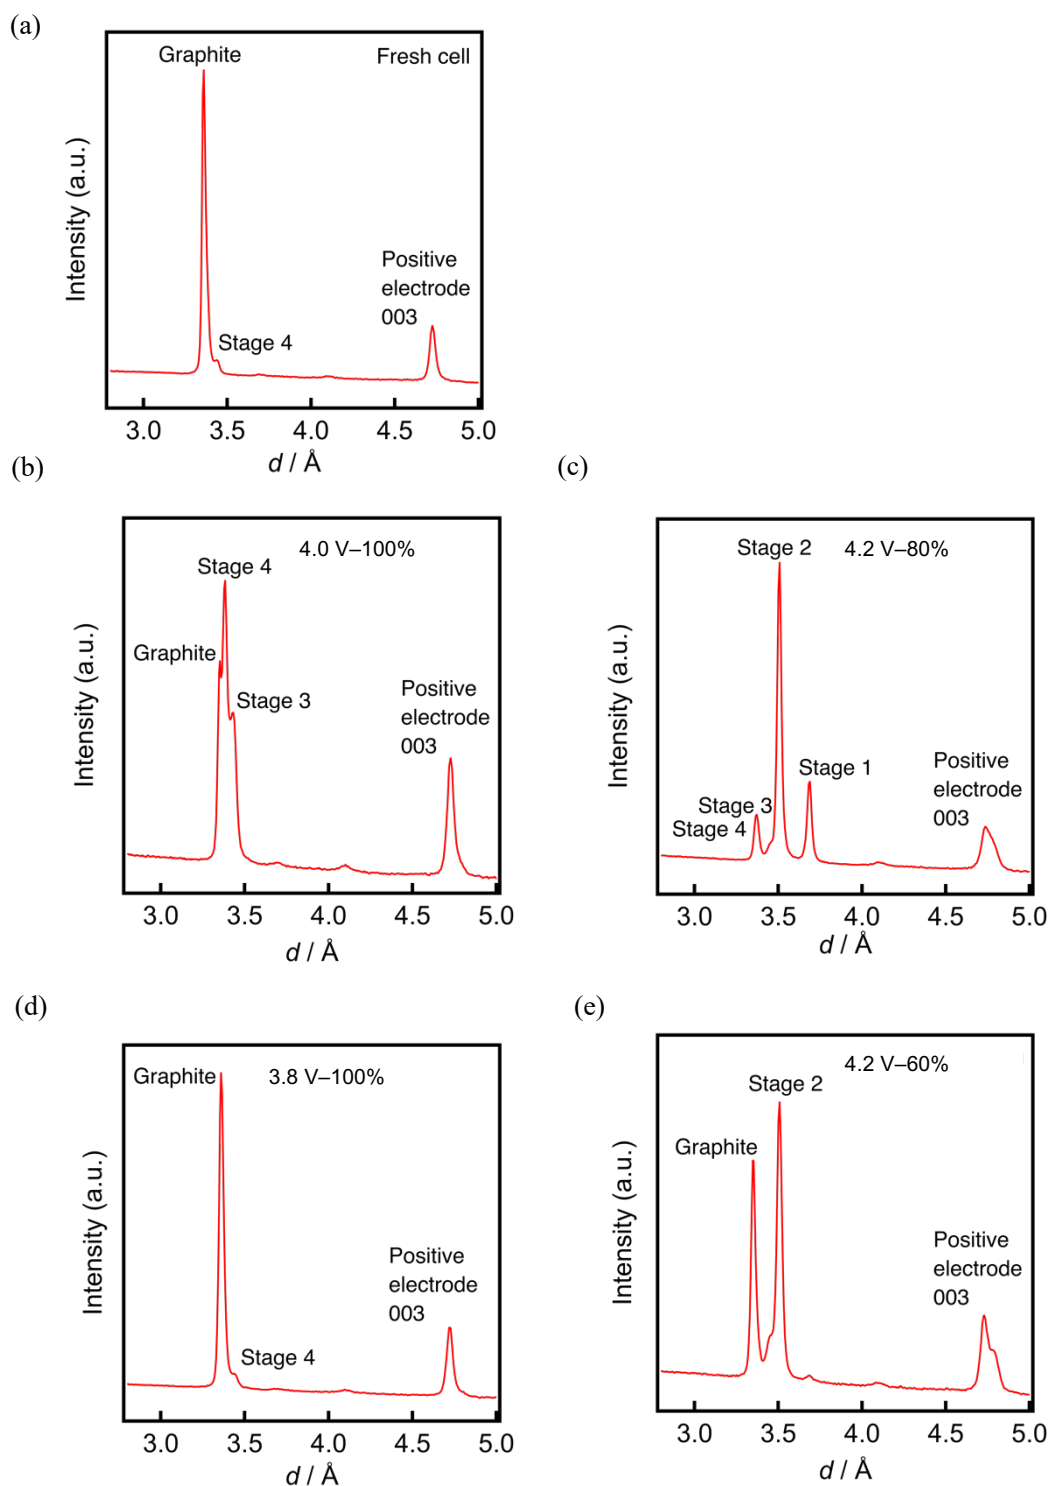

Fig. S5 In-situ neutron diffraction profiles at the end of discharging of (a) fresh cell, (b) 4.0 V–100% after 476 days, (c) 4.2 V–80% after 323 days, (d) 3.8 V–100% after 476 days, and (e) 4.2 V–60% after 428 days.

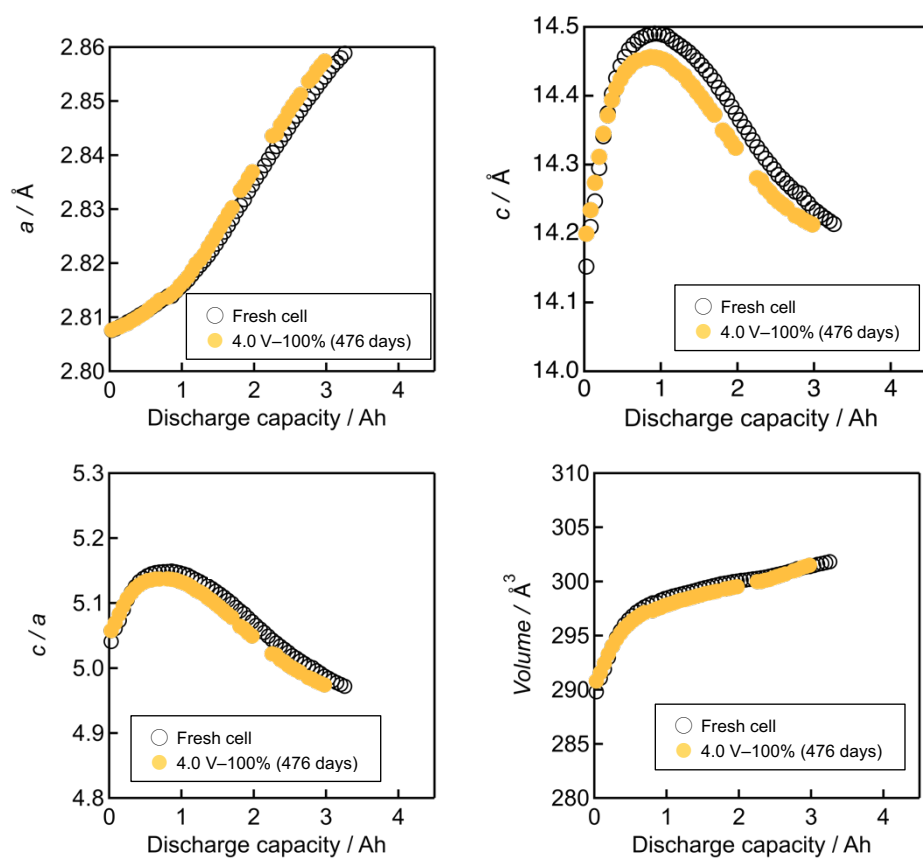

Fig. S6. Evolutions of lattice constants  $a$  and  $c$ , ratio  $c/a$  and unit cell volume of the layered positive material aged by 4.0 V-100% mode.

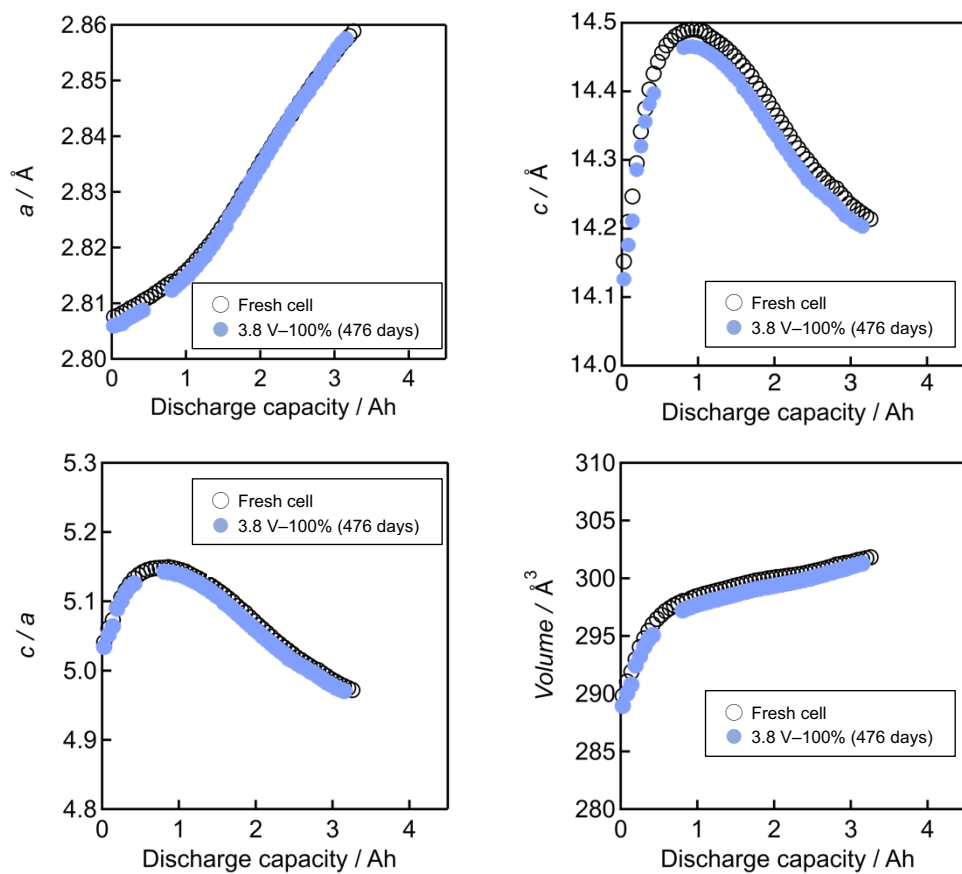

Fig. S7. Evolutions of lattice constants  $a$  and  $c$ , ratio  $c/a$  and unit cell volume of the layered positive material aged by 3.8 V-100% mode.



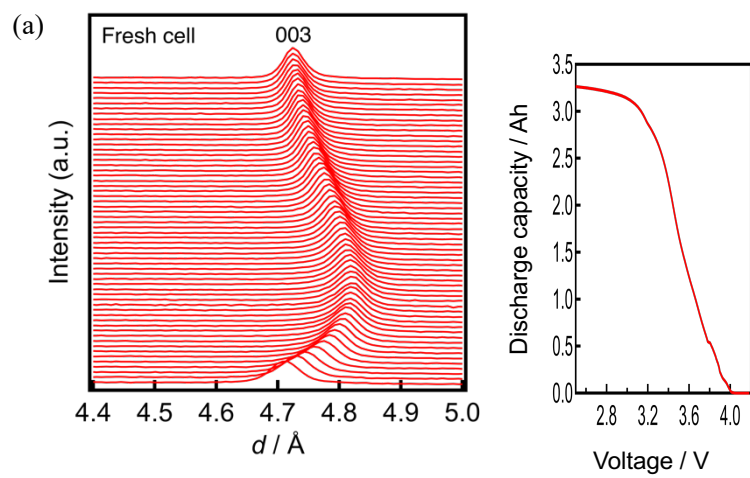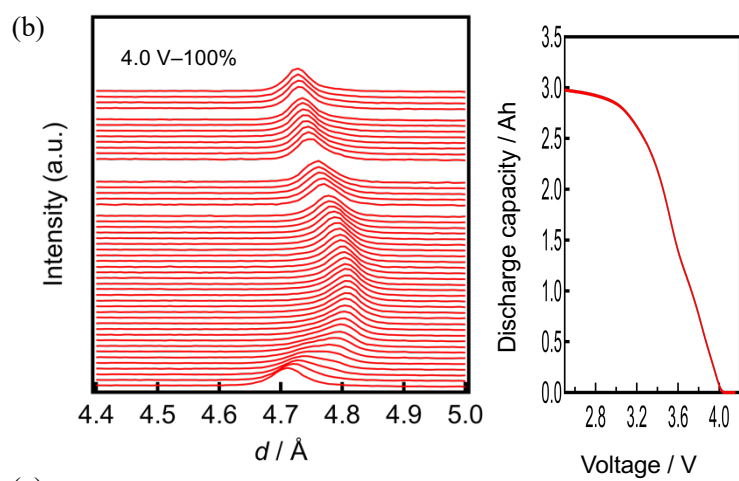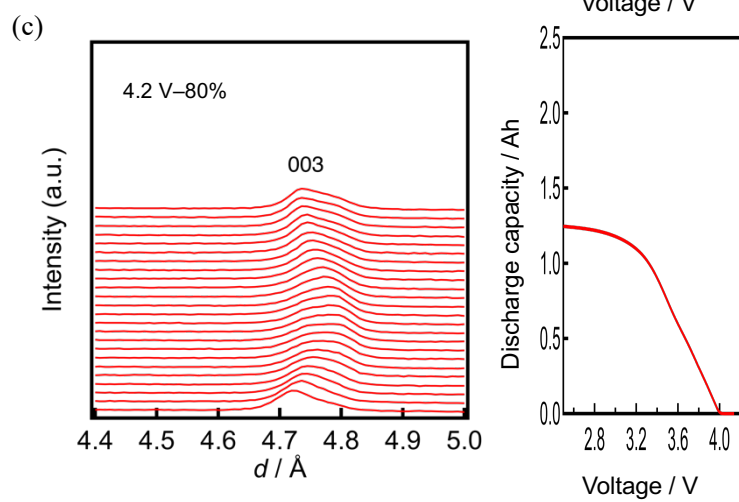

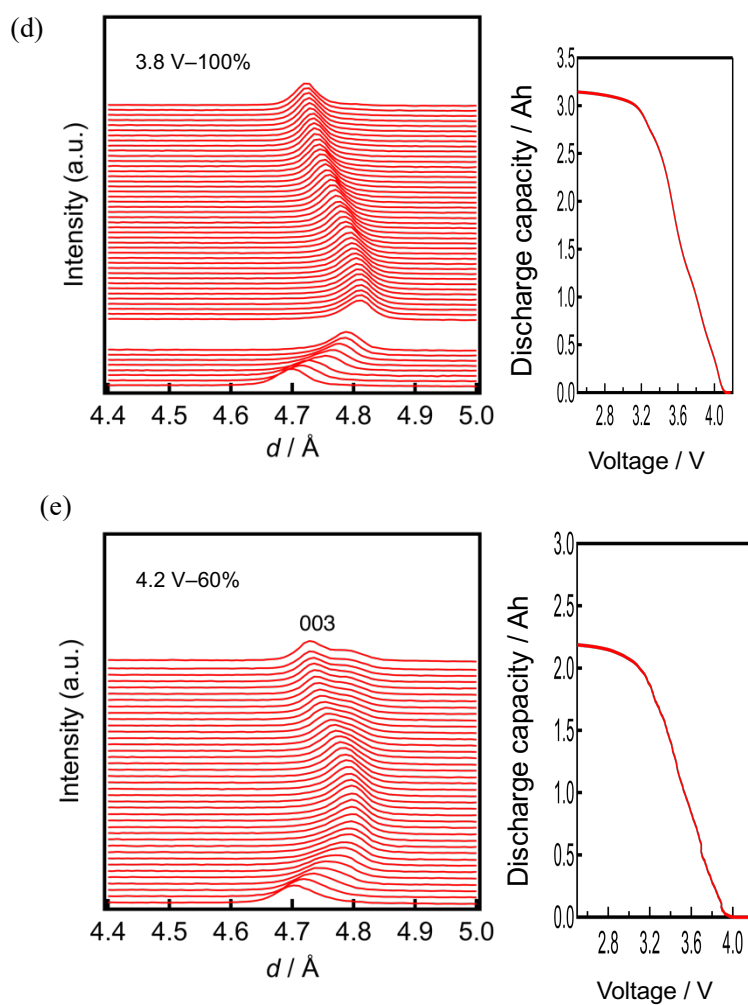

Fig. S8 Operando neutron diffraction and voltage profiles of layered positive 003 reflection during 0.1 C discharging (a) fresh cell, (b) 4.0 V-100% after 476 days, (c) 4.2 V-80% after 323 days, (d) 3.8 V-100% after 476 days, and (e) 4.2 V-60% after 428 days.
